# Supplementary material for: Significance of ligand interactions involving Hop2-Mnd1 and the RAD51 and DMC1 recombinases in homologous DNA repair and XX ovarian dysgenesis
Source: PubMed Central journal article supplement (PMC4417169; doi:10.1093/nar/gkv259), 2015-03-27
Supplement: supp_gkv259_nar-00228-m-2015-File010.pdf [file supp_gkv259_nar-00228-m-2015-File010.pdf]

Supporting information (including 4 supplementary figures and legends)

Figure S1

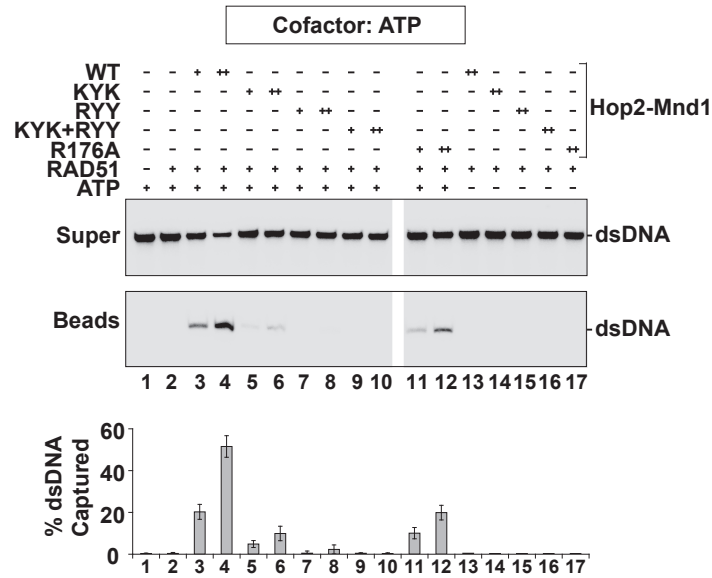

**Supplementary Figure S1. Role of the N-terminal DNA binding domains of Hop2-Mnd1 in duplex DNA capture with ATP as nucleotide co-factor.**

Wild type (WT) and mutant variants of the Hop2-Mnd1 complex (0.6 or 1.2  $\mu$ M) were tested for their ability to promote duplex capture with ATP as the nucleotide cofactor. The mean values  $\pm$  s.d. from three independent experiments were plotted.

Figure S2

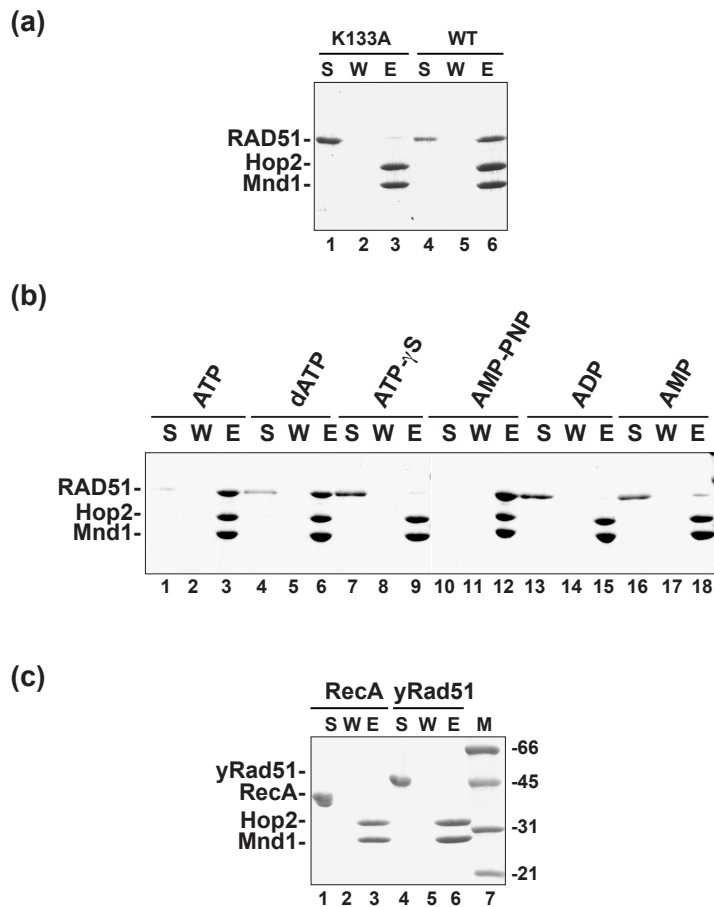

**Supplementary Figure S2. Nucleotide cofactor dependence and specificity of the interaction between RAD51 and Hop2-Mnd1.**

**(a)** Pulldown assay to test for the interaction of RAD51 or RAD51(K133A) with (His)<sub>6</sub>-tagged Hop2-Mnd1 using Ni<sup>2+</sup>-NTA resin to capture protein complexes. Analysis was conducted as in Figure 4a.

**(b)** Pulldown assay to test for the interaction of RAD51 with Hop2-Mnd1 as in (a) under various conditions with different nucleotide cofactor as indicated.

**(c)** Pulldown assay to test for the interaction of Hop2-Mnd1 with RecA from *E. coli* or Rad51 from *S. cerevisiae* as in (a).

Figure S3

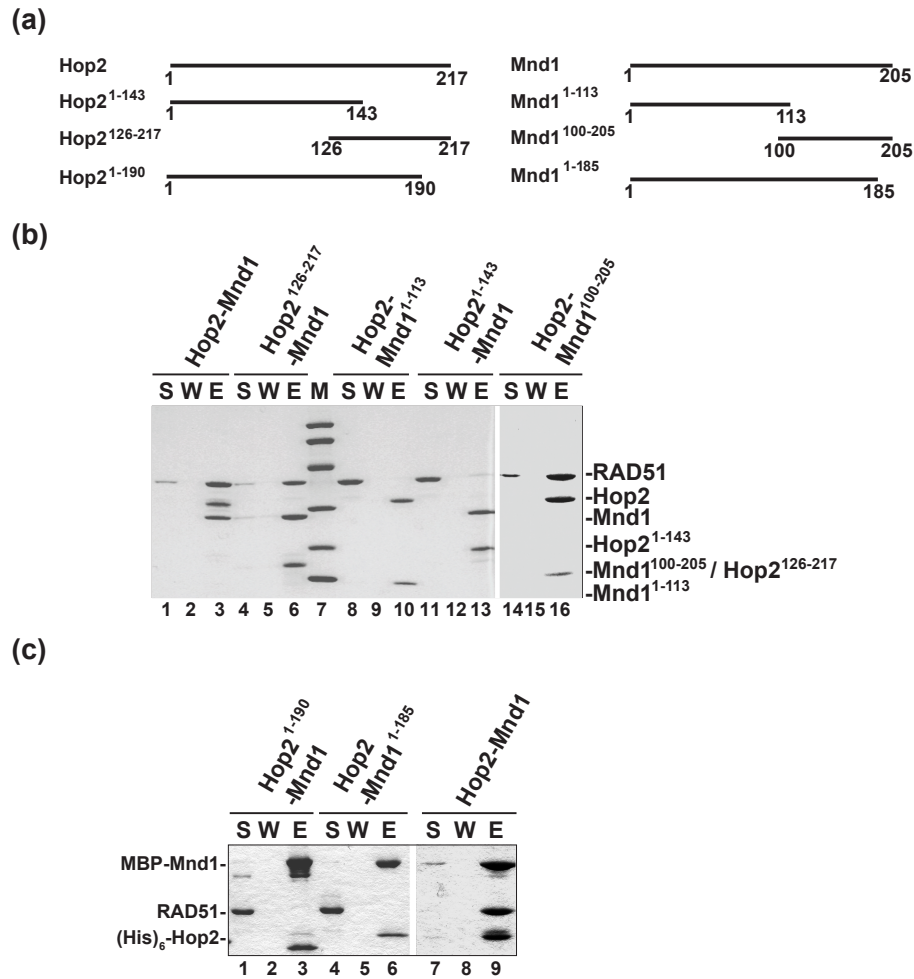

**Supplementary Figure S3. The C-termini of Hop2 and Mnd1 are required for interaction of Hop2-Mnd1 with RAD51.**

(a) Summary of the Hop2-Mnd1 truncation mutants.

(b) Pull-down assays to test for the interaction of RAD51 with (His)<sub>6</sub>-tagged truncation mutants of Hop2-Mnd1. Analysis was conducted as in Figure 4a.

(c) Pull-down assay to test for the interaction of RAD51 with (His)<sub>6</sub>-tagged Hop2-Mnd1 and its truncated mutants (Hop2-Mnd1<sup>1-185</sup> and Hop2<sup>1-190</sup>-Mnd1) as in (b).

Figure S4

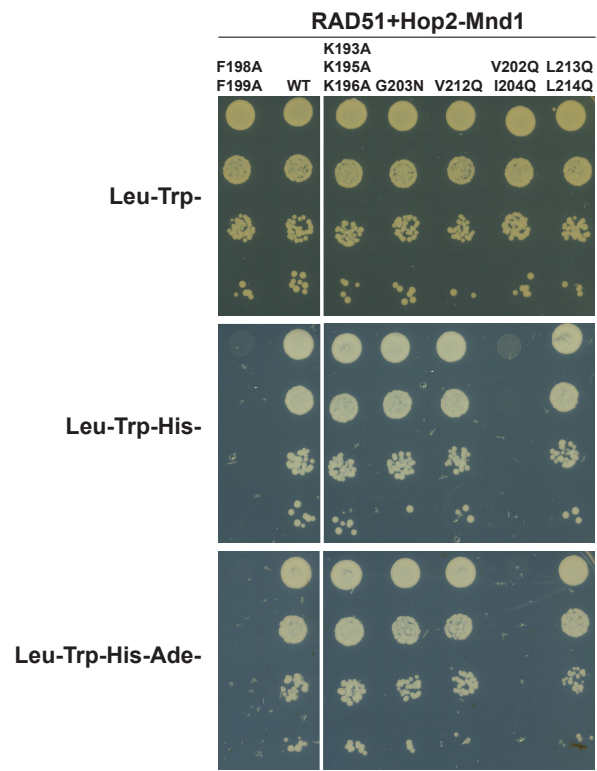

**Supplementary Figure S4. Testing of Hop2 mutants in the yeast three-hybrid analysis.**

Yeast three hybrid analysis to test the interaction of RAD51 with Hop2-Mnd1 and its various mutants as indicated.
